# Supplementary material for: Glutathione-triggered nanoplatform for chemodynamic/metal-ion therapy
Source: Royal Society of Chemistry journal article supplement (doi:10.1039/d1tb01330k), 2021-01-01
Supplement: d1tb01330k1.pdf [file d1tb01330k1.pdf]

## Glutathione-triggered Nanoplatfom for Chemodynamic/Metal Ion Therapy

Min Liu <sup>a</sup>, Hongshuai Wu <sup>a</sup>, Senlin Wang <sup>a</sup>, Jinzhong Hu <sup>a</sup>, Baiwang Sun\* <sup>a</sup>

<sup>a</sup> School of Chemistry and Chemical Engineering, Southeast University, Nanjing  
211189, PR China. *Fax:* +86 25 52090614, *Tel:* +86 25 52090614, *E-mail address:*  
*chmsunbw@seu.edu.cn*

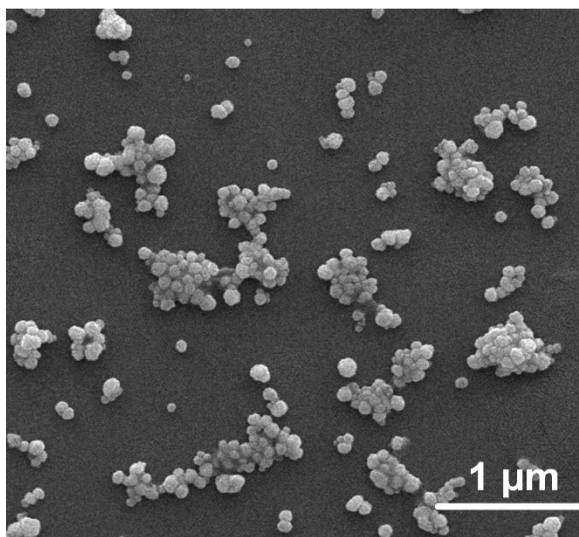

**Figure S1.** SEM image of Ag@HKU.

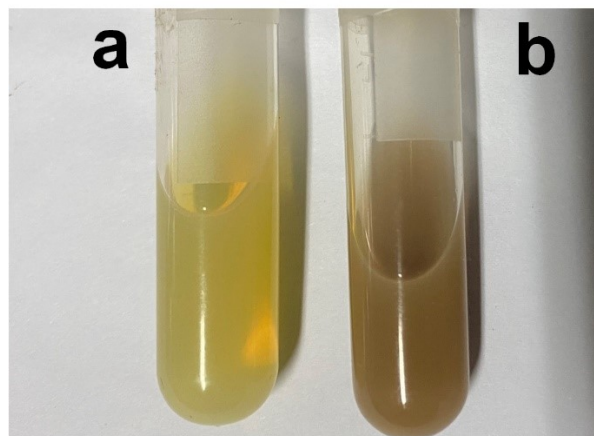

**Figure S2.** Picture of (a) Ag NPs and (b) Ag@HKU.

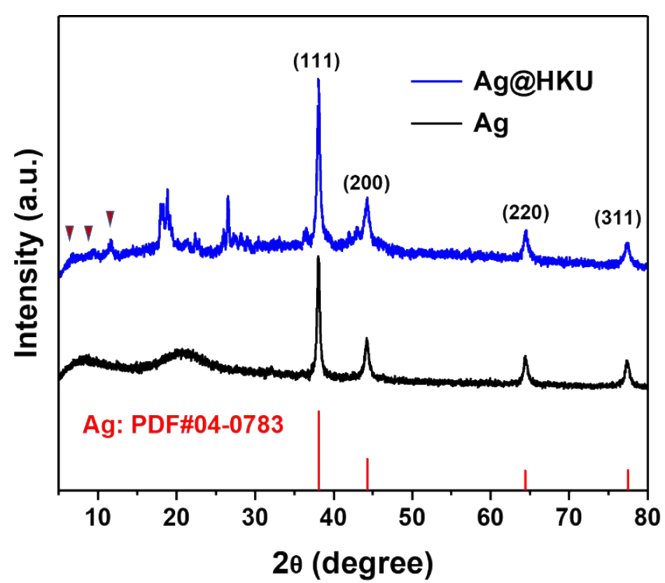

**Figure S3.** XRD patterns of Ag NPs and Ag@HKU.

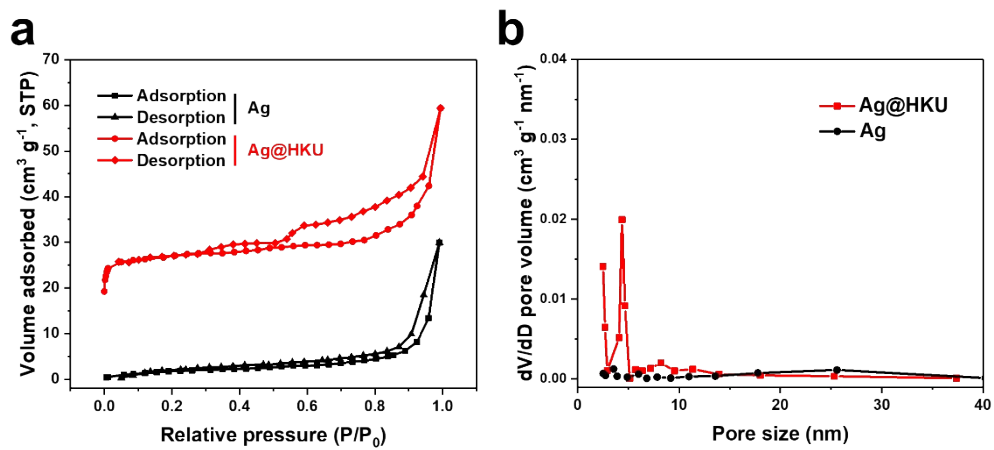

**Figure S4.** (a) N<sub>2</sub> adsorption and desorption isotherms. (b) Pore size distribution plots.

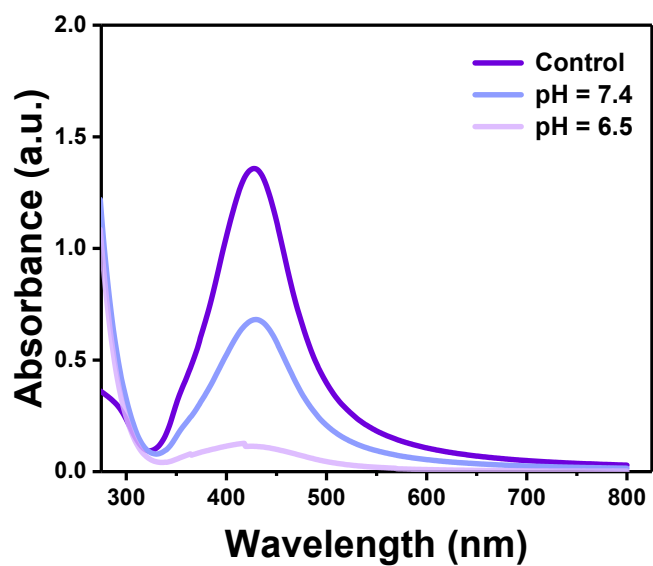

**Figure S5.** The decrease curve oabsorbance at 435 nm of Ag NPs plus H<sub>2</sub>O<sub>2</sub> with different pH.

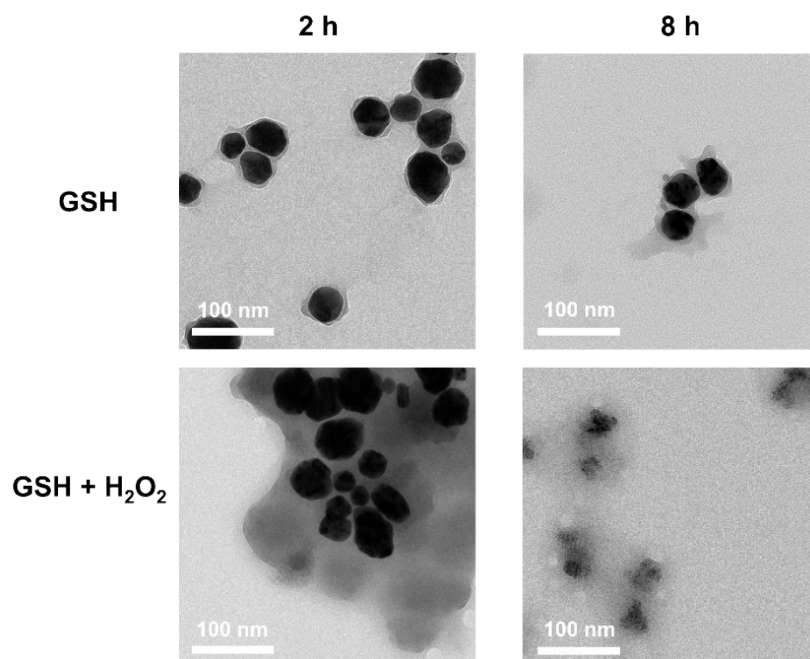

**Figure S6.** TEM images of Ag@HKU after different treatment (GSH and GSH plus H<sub>2</sub>O<sub>2</sub>) for different periods of time.

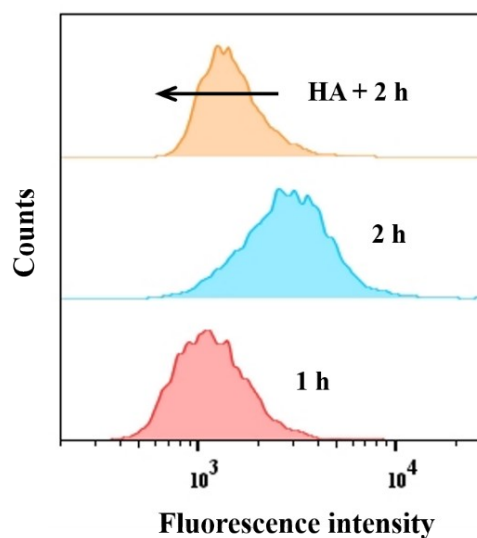

**Figure S7.** The fluorescence intensity of FITC in HeLa cells after various treatments.

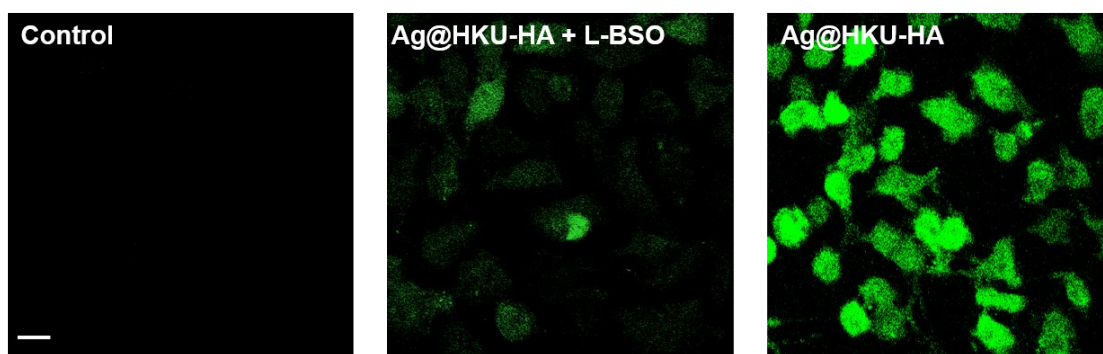

**Figure S8.** CLSM images of ROS levels in HeLa cells treated with different formulations for 8 h. Scale bar: 50  $\mu\text{m}$ .

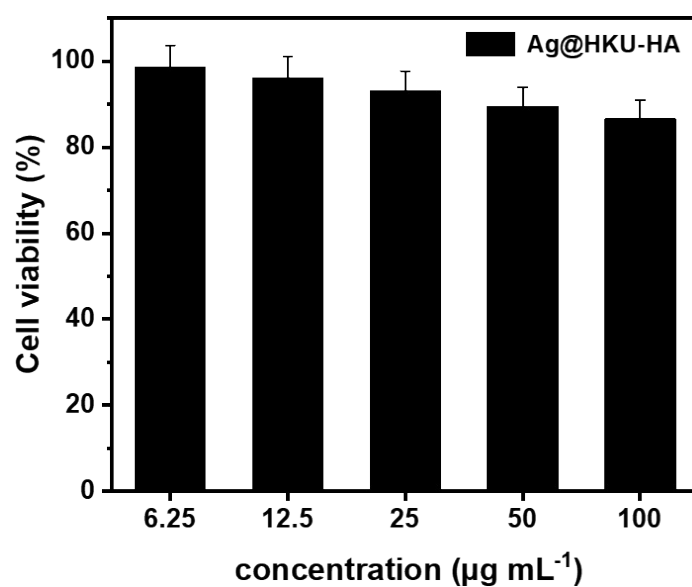

**Figure S9.** Cell viability of LO2 cells treated with Ag@HKU-HA NPs.

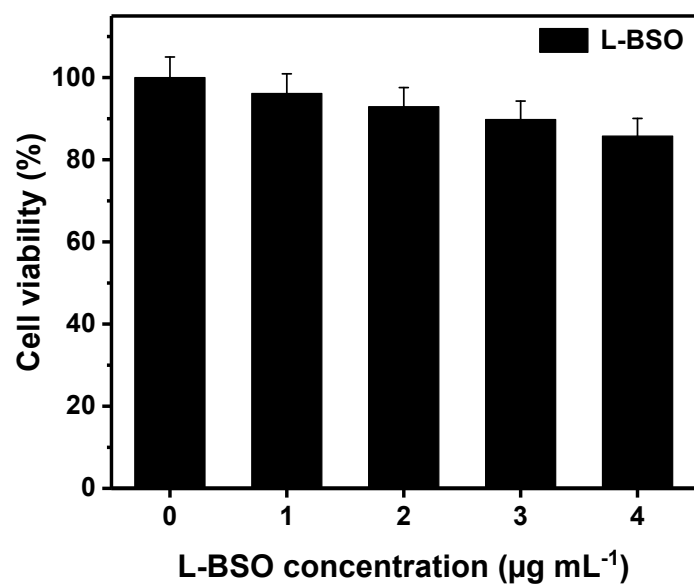

**Figure S10.** Cell viability of HeLa cells treated with different concentrations of L-BSO.

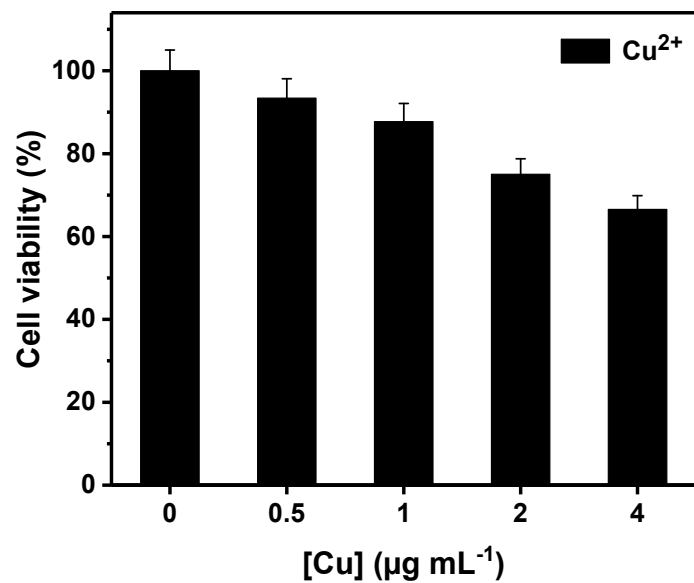

**Figure S11.** Cell viability of HeLa cells treated with different concentrations of  $\text{Cu}^{2+}$ .
